# Supplementary material for: CO2-Acidolysis of iminoboronate ester based polymersomes
Source: Royal Society of Chemistry journal article supplement (doi:10.1039/c8tb02496k), 2018-01-01
Supplement: c8tb02496k1.pdf [file c8tb02496k1.pdf]

Electronic Supplementary Information

**CO<sub>2</sub>-Acidolysis of Iminoboronate Ester Based Polymersomes**

**Ruidong Cheng,<sup>a</sup> Guo Li,<sup>\*a</sup> Li Fan,<sup>\*b</sup> Zhaotie Liu,<sup>a</sup> Zhongwen Liu,<sup>a</sup> and Jinqiang Jiang <sup>\*a</sup>**

<sup>a</sup> Key Laboratory of Applied Surface and Colloid Chemistry, Ministry of Education, School of Chemistry and Chemical Engineering,

Shaanxi Normal University, Xi'an, Shaanxi Province, P. R. China 710062. E-mail: [liguo@snnu.edu.cn](mailto:liguo@snnu.edu.cn), [jiangjq@snnu.edu.cn](mailto:jiangjq@snnu.edu.cn)

<sup>b</sup> Department of Pharmaceutical Analysis, School of Pharmacy, Fourth Military Medical University, Xi'an, Shaanxi Province, P. R. China

7100032. E-mail: [xxfanny@fmmu.edu.cn](mailto:xxfanny@fmmu.edu.cn)

## List of Contents:

1. Materials and Methods
2. Polymer Synthesis
3. Polymersomes Preparation
4. pH Changes vs. amount of CO<sub>2</sub>
5. <sup>1</sup>H NMR Changes of N<sub>3</sub>-(OEG-IBCAPE)<sub>4</sub> before and after CO<sub>2</sub> Bubbling
6. The Morphology Analysis of Polymersomes
7. Absorption, Emission Spectra and DLS Analysis of Polymersomes
8. Absorption and Emission Spectra Analysis of mPEG-IBARS Aqueous Solutions
9. The Cellular Uptake of Polymersomes Observed with Confocal Laser Scanning Microscopy
10. In Vitro Cytotoxicity Assay

## 1. Materials and Methods

Poly(ethylene glycol) diglycidyl ether (PEGDGE,  $M_n = 394$ ), 2, 2'-Diamino-N-methyldiethylamine (DNMDA), cysteamine, formylphenylboronic acid (FPBA), caffeic acid phenethyl ester (CAPE), methoxypolyethylene glycol amine (mPEG-NH<sub>2</sub>,  $M_n = 2000$ ), Alizarin Red S (ARS), tributylphosphine, dimethylsulfoxide (DMSO) were purchased from Aladdin and used without further purification. 3-(4, 5-dimethylthiazol-2-yl)-2, 5-diphenyltetrazolium bromide (MTT) and Hoechst-33342 were obtained from Sigma Chemical Co. (USA). Ultrapure water was prepared utilizing a FDY-1002-UV-P purification system.

<sup>1</sup>H-NMR (400 MHz) spectra were investigated by a Bruker spectrometer with CDCl<sub>3</sub>, d<sub>8</sub>-THF and D<sub>2</sub>O as solvent, respectively. Absorption spectra were acquired on Evolution 220 spectrophotometer at 25 °C with a thermostatted cuvette holder. Fluorescence emission spectra were measured with a PTI fluorescence master system at 25 °C with a thermostatted cuvette holder. The slit width was maintained at 3 nm for excitation and 1 nm for emission, respectively. Dynamic light scattering (DLS) measurements were performed with a Malvern Nano-ZS90 instrument to determine the average diameter and size distribution of the micelles at 25 °C. Transmission electron microscopy (TEM) observations were carried out using a JEM-2100 microscope. The samples were prepared by dropping the micellar solution onto copper specimen grids (400 mesh, supported with formvar/carbon film), and dried at room temperature overnight. Field-emission scanning electron microscope (FE-SEM) observations were conducted on a high resolution HITACHI SU8220 field-emission scanning electron microscopy. The samples for SEM observations were prepared without gold coating. AFM was taken with a CSPM5500A scanning probe microscope system (Beijing Nano-Instruments Co., Ltd.) in the tapping mode. Samples were prepared by dropping the micellar solution onto mica sheets and drying the sheets at room temperature overnight. Confocal laser scanning microscopy (CLSM) images were acquired using a Leica TCS SP5 microscope.

## 2. Polymer Synthesis

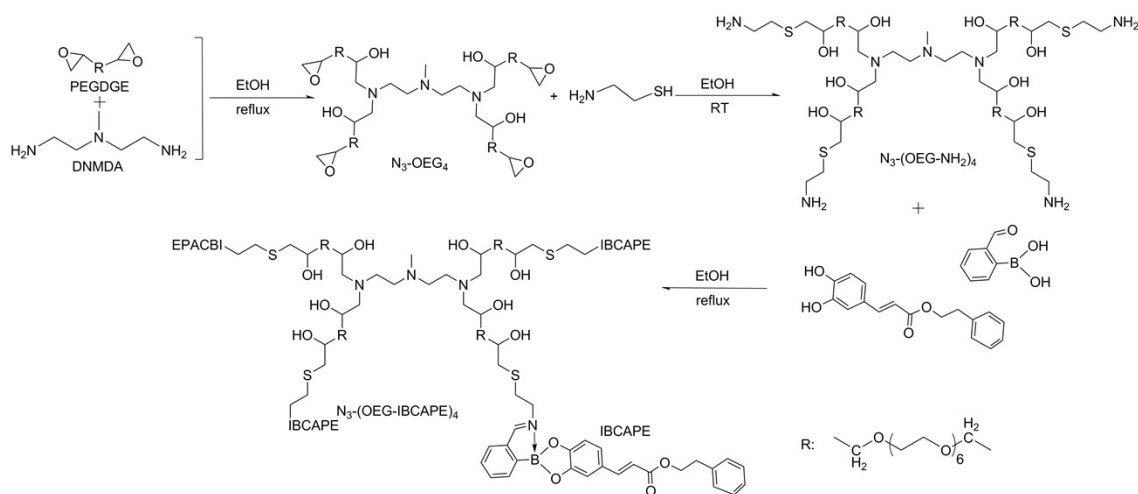

**Figure S1.** The synthetic route to the amphiphilic starlike prodrug of  $N_3-(OEG-IBCAPE)_4$ .

Figure S1 showed the synthetic route to the amphiphilic starlike prodrug of  $N_3$ -(OEG-IBCAPE) $_4$ . The preparation for  $N_3$ -(OEG-IBCAPE) $_4$  is detailed below.

Poly(ethylene glycol) diglycidyl ether (PEGDGE,  $M_n = 394$ , 12.04 g, 30.54 mmol) and 10 mL of anhydrous ethanol were placed into a 50 mL round bottom flask. After 30 min of stirring at room temperature, the round-bottom flask was placed in a preheated oil bath (80 °C). Then, 2, 2'-Diamino-N-methyldiethylamine (DNMDA, 0.37 g, 3.15 mmol) in anhydrous ethanol solution (2 mL) dropped wisely added while stirring and the reaction was maintained at 80 °C for 12 h. Thereafter, the reaction mixture was concentrated and precipitated with anhydrous ether. The obtained product was dried under vacuum to yield a white sticky semi-solid substance of  $N_3$ -OEG $_4$  4.88 g (yielding, 93.38%).

$^1\text{H-NMR}$  (400 MHz,  $\text{D}_2\text{O}$ ,  $\delta$ ): 4.04-3.49 (-OCH $_2$ CH $_2$ O- and -CH(OH)-), 3.49-3.33 (-CH $_2$ -O-C-), 3.33-3.08 (- (HO)CCH $_2$ N<), 3.02-2.96 (-C-O-CH-), 2.74-2.65 (>NCH $_2$ CH $_2$ N< and >NCH $_3$ ).

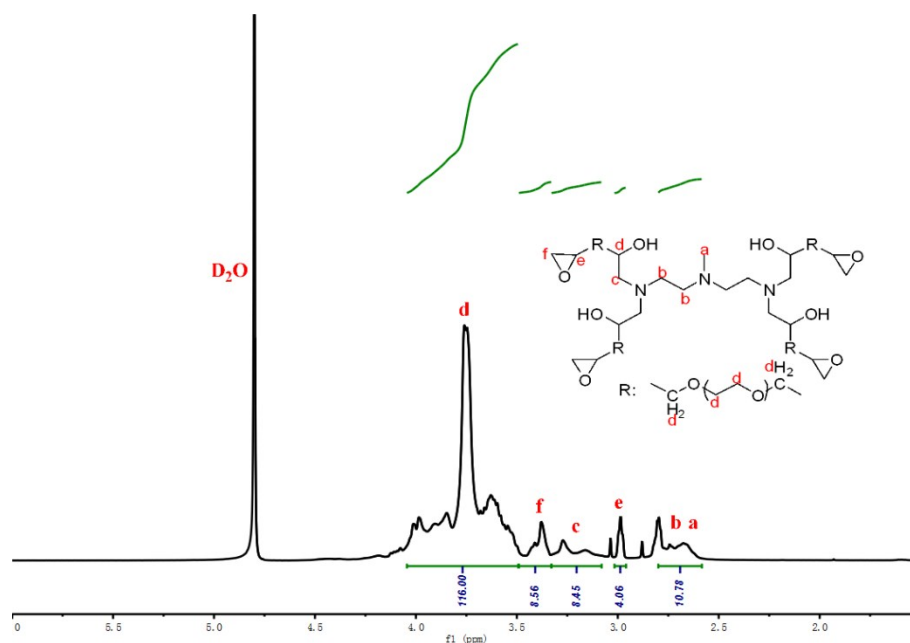

**Figure S2.** The  $^1\text{H-NMR}$  spectrum of  $N_3$ -OEG $_4$  in  $\text{D}_2\text{O}$ .

The obtained prepolymer of  $N_3$ -OEG $_4$  (4.60 g, 2.71 mmol) in ethanol (3 mL) was added drop wisely in the ethanol solution (5 mL) of cysteamine (1.26 g, 16.33 mmol) at room temperature and the system was maintained for 4 h under  $\text{N}_2$ . After this, the system was concentrated and precipitated with anhydrous ether. The obtained product was dried under vacuum to yield a white sticky semi-solid substance of  $N_3$ -(OEG-NH $_2$ ) $_4$  5.18 g (yielding, 95.26%).

$^1\text{H-NMR}$  (400 MHz,  $\text{D}_2\text{O}$ ,  $\delta$ ): 4.11-3.44 (-OCH $_2$ CH $_2$ O-, -CH(OH)CH $_2$ SCH $_2$ CH $_2$ NH $_2$ ), 3.35-3.11 (- (HO)CCH $_2$ N<), 2.70-2.65 (>NCH $_2$ CH $_2$ N<, >NCH $_3$ ).

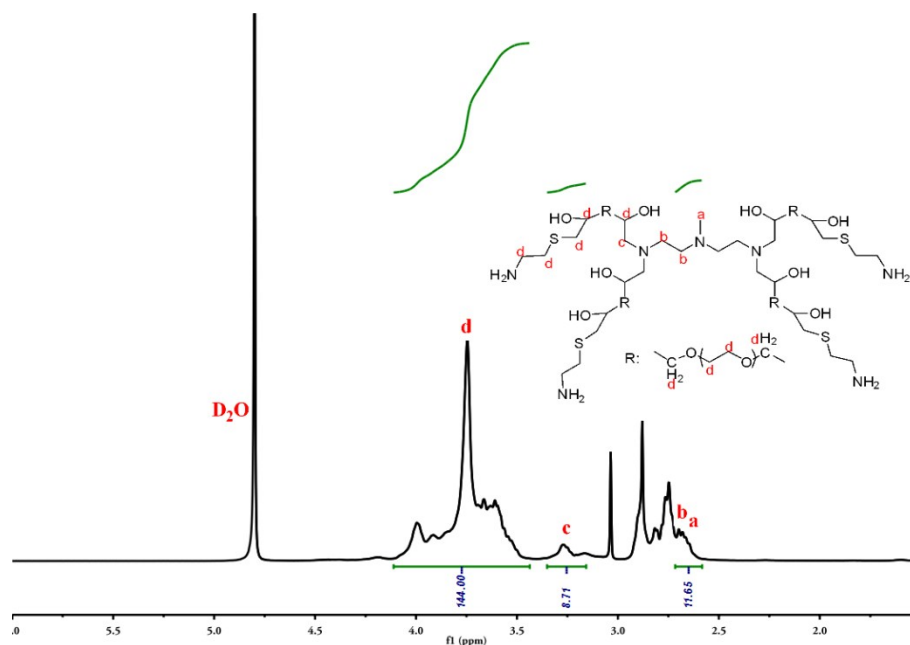

**Figure S3.** The  $^1\text{H}$ -NMR spectrum of  $\text{N}_3\text{-(OEG-NH}_2)_4$  in  $\text{D}_2\text{O}$ .

$\text{N}_3\text{-(OEG-NH}_2)_4$  (2.78 g, 1.39 mmol), formylphenylboronic acid (FPBA, 0.87 g, 5.84 mmol), caffeic acid phenethyl ester (CAPE, 1.66 g, 5.84 mmol) and anhydrous ethanol (5 mL) were quickly added into a 50 mL round-bottom flask. After 30 min of stirring at room temperature, the round-bottom flask was placed in a preheated oil bath ( $80^\circ\text{C}$ ) for 12 h. The crude product was collected by precipitation twice in the anhydrous ether. Finally, the polymer was dried to constant weight under vacuum oven to give a light yellow solid substance of  $\text{N}_3\text{-(OEG-IBCAPE)}_4$  4.98 g (yielding, 95.78%). Anal. Calcd for  $\text{C}_{181}\text{H}_{247}\text{B}_4\text{N}_7\text{O}_{52}\text{S}_4$ : C, 61.68; H, 7.06; N, 2.78. Found: C, 61.65; H, 7.11; N, 2.70.

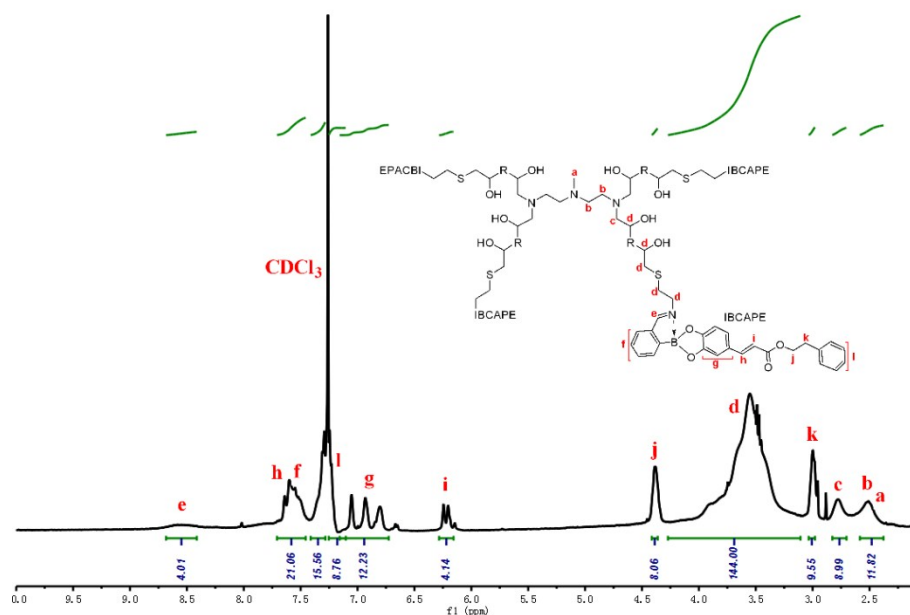

**Figure S4.** The  $^1\text{H}$ -NMR spectrum of  $\text{N}_3\text{-(OEG-IBCAPE)}_4$  in  $\text{CDCl}_3$ .

$^1\text{H-NMR}$  (400 MHz,  $\text{CDCl}_3$ ,  $\delta$ ): 8.74-8.38 (-C=N-), 7.72-6.60 (Ar-H, Ar-CH<sub>2</sub>=C-), 6.34-6.04 (Ar-C=CH-), 4.42-4.35 (-C(O)OCH<sub>2</sub>-), 4.29-3.07 (-OCH<sub>2</sub>CH<sub>2</sub>O-, -CH(OH)CH<sub>2</sub>SCH<sub>2</sub>CH<sub>2</sub>NH<sub>2</sub>), 3.04-2.98 (-C(O)OC-CH<sub>2</sub>-Ar), 2.82-2.71 (-CH(OH)CHCH<sub>2</sub>N<), 2.58-2.38(>NCH<sub>2</sub>CH<sub>2</sub>N<, >NCH<sub>3</sub>).

### 3. Polymersomes Preparation

In the polymersomes preparation experiment, N<sub>3</sub>-(OEG-IBCAPE)<sub>4</sub> (9.0 mg), H<sub>2</sub>O (6.0 mL) were added together and stirred for 12 h. Finally, the polymersomes solution was diluted to 1.5 mg mL<sup>-1</sup> (with respect to polymer in water).

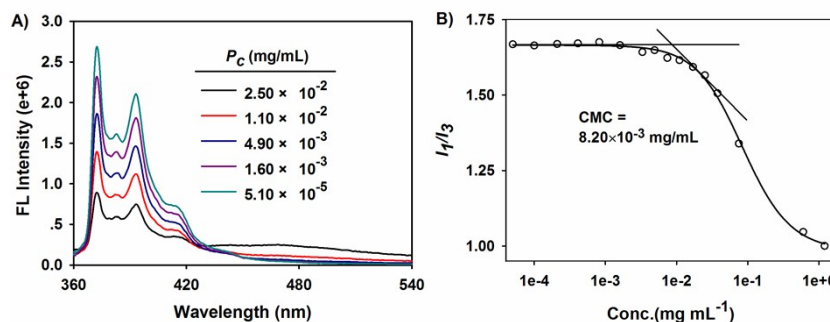

**Figure S5.** A) Fluorescence emission spectra excited at 340 nm as a function of polymer concentration in previously pyrene saturated aqueous solution. B) Changes in the ratio of  $I_1/I_3$  of pyrene emission as a function of polymer concentration.

In order to determine the critical self-assembly concentration (CSAC) of N<sub>3</sub>-(OEG-IBCAPE)<sub>4</sub> in aqueous solution, the fluorescence pyrene probe technique was applied. As shown in Figure S5A, the fluorescence emission spectra of N<sub>3</sub>-(OEG-IBCAPE)<sub>4</sub> in pyrene saturated aqueous solution exhibited a characterized vibrational five peaks emission of pyrene. The ratio of the first ( $I_1$  at 372 nm) and third peaks ( $I_3$  at 382 nm) of pyrene emission remained constant up to a certain polymer concentration and decreases exponentially above it (see Figure S5B). This change reflected the onset of vesicle formation and the partitioning of the pyrene between the aqueous and vesicle phases. Therefore, the CSAC value for N<sub>3</sub>-(OEG-IBCAPE)<sub>4</sub> in aqueous solution is  $8.20 \times 10^{-3} \text{ mg mL}^{-1}$ .

### 4. pH Changes vs. amount of CO<sub>2</sub>

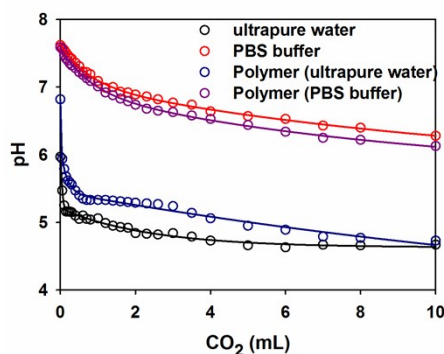

**Figure S6.** The pH changes of ultrapure water, PBS buffer and N<sub>3</sub>-(OEG-IBCAPE)<sub>4</sub> in ultrapure water and PBS buffer

solutions ( $0.25 \text{ mg mL}^{-1} \times 1.5 \text{ mL}$ ) upon  $\text{CO}_2$ , respectively.

The pH changes of ultrapure water, PBS buffer and  $\text{N}_3\text{-(OEG-IBCAPE)}_4$  in ultrapure water and PBS buffer solutions ( $0.25 \text{ mg mL}^{-1} \times 1.5 \text{ mL}$ ) along with the adding amount of  $\text{CO}_2$  bubbling were automatically recorded by a pH sensor (Mettler-Toledo Instruments Co., Ltd) at  $25^\circ\text{C}$ , respectively.

## 5. $^1\text{H}$ NMR Changes of $\text{N}_3\text{-(OEG-IBCAPE)}_4$ before and after $\text{CO}_2$ Bubbling

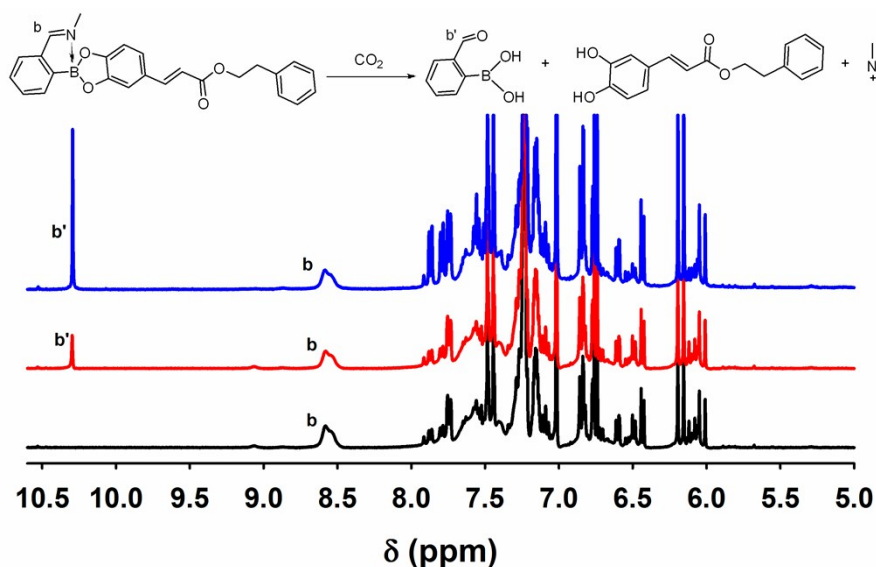

**Figure S7.**  $^1\text{H}$  NMR spectra of  $\text{N}_3\text{-(OEG-IBCAPE)}_4$  ( $25.0 \text{ mg mL}^{-1} \times 0.5 \text{ mL}$ ) in  $\text{d}_8\text{-THF}$  (black) and the mixture of  $\text{d}_8\text{-THF}/\text{D}_2\text{O}$  (v/v, 4/1) before (red) and after 20 mL  $\text{CO}_2$  bubbling (blue).

As shown in Figure S7, the starting  $^1\text{H}$  NMR spectra of  $\text{N}_3\text{-(OEG-IBCAPE)}_4$  ( $25.0 \text{ mg mL}^{-1} \times 0.5 \text{ mL}$ ) in  $\text{d}_8\text{-THF}$  (black) displayed a newly formed signal of  $-\text{CH}=\text{N}-$  at  $\approx 8.58 \text{ ppm}$ , indicating the efficient occurrence of the aldehyde-amine condensation reaction of the iminoboronate ester reaction system. In order to better observe the spectral changes, the prepared prodrug was dissolved in  $\text{d}_8\text{-THF}/\text{D}_2\text{O}$  mixture (v/v, 4/1) (red). It can be seen a newly forming peak of  $-\text{CHO}$  group appeared at  $\sim 10.30 \text{ ppm}$ , indicating the hydrolysis-induced disintegration of the segmental iminoboronate moieties. However, even after the polymer solution was placed for 24 h, the proton signal intensity of  $-\text{CH}=\text{N}-$  at  $\approx 8.58 \text{ ppm}$  almost completely remain. Further, in the presence of 20 mL  $\text{CO}_2$ , a newly formed formyl proton ( $-\text{CH}=\text{O}$ ,  $\sim 10.30 \text{ ppm}$ ) greatly increased while the imine proton ( $-\text{CH}=\text{N}-$ ,  $\sim 8.58 \text{ ppm}$ ) declined slightly, ascribing to the weak acidity of  $\text{CO}_2$  in aqueous solution and also the extremely high concentration of iminoboronates in the system. After hydrolysis, iminoboronate moieties were cleaved into three components of primary amine, CAPE and 2-formylphenylboronic acid (FPBA).

## 6. The Morphology Analysis of Polymer Self-Assemblies

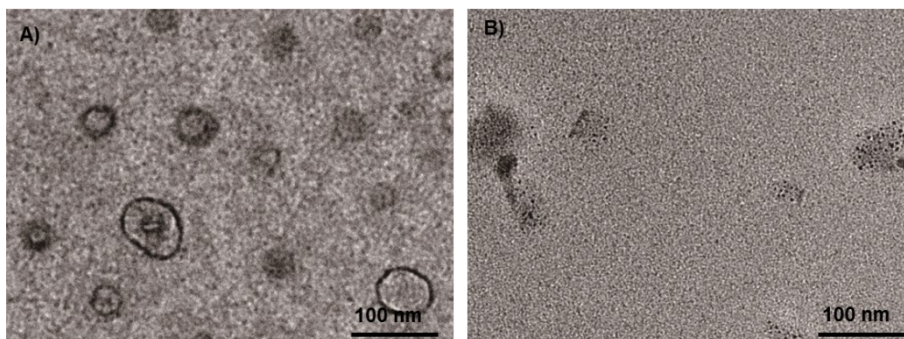

**Figure S8.** TEM images of the  $N_3$ -(OEG-IBCAPE) $_4$  polymersomes before (A) and after (B)  $CO_2$  bubbling.

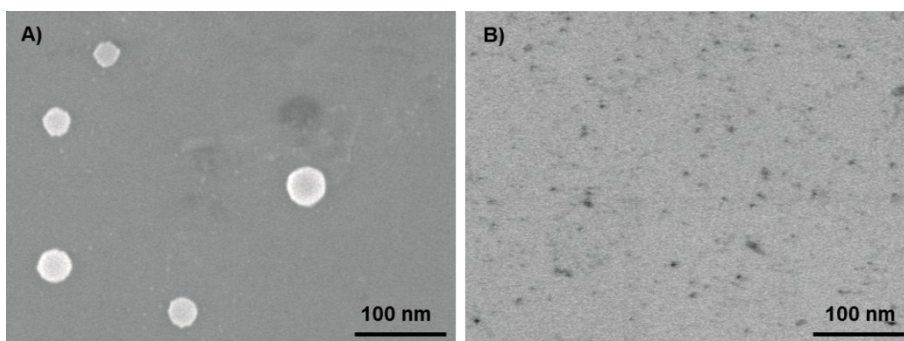

**Figure S9.** SEM images of the  $N_3$ -(OEG-IBCAPE) $_4$  polymersomes before (A) and after (B)  $CO_2$  bubbling.

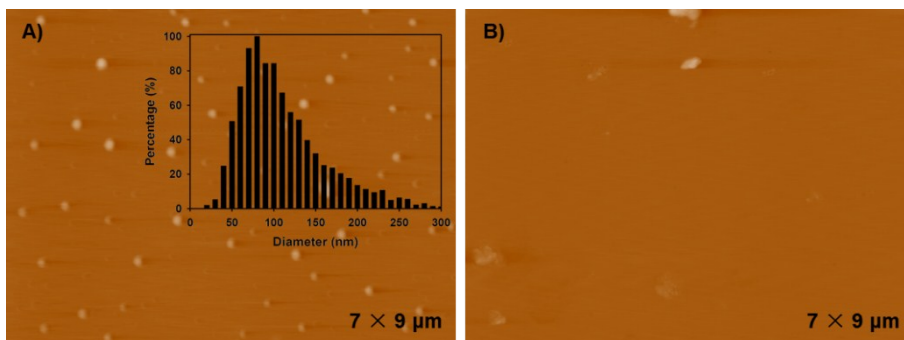

**Figure S10.** AFM observations of the  $N_3$ -(OEG-IBCAPE) $_4$  polymersomes before (A) and after (B)  $CO_2$  bubbling, the size distribution of nanoparticles (the inset in A).

As shown in Figure S10A, the polymeric self-assemblies of  $N_3$ -(OEG-IBCAPE) $_4$  were visualized with nanospheres with the average diameter ( $DAFM$ ) of 100 nm. By contrast, no vesicles remained in the solution after  $CO_2$  bubbling because of the cleavage of iminoboronate ester of  $N_3$ -(OEG-IBCAPE) $_4$  upon bubbling of  $CO_2$ .

## 7. Absorption, Emission Spectra and DLS Analysis of Polymer Aqueous Solutions

During the experiment, the vesicular dispersion of  $N_3$ -(OEG-IBCAPE) $_4$  ( $0.25 \text{ mg mL}^{-1} \times 1.5 \text{ mL}$ ) was sealed in a quartz cuvette at  $25^\circ\text{C}$  with mild stirring, and different amounts of  $CO_2$  were injected into the solution.

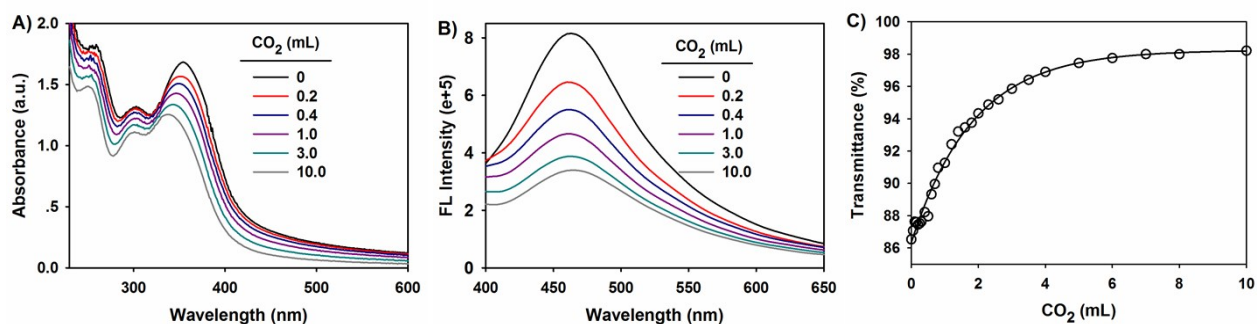

**Figure S11.** Absorption (A), fluorescence emission (B,  $\lambda_{\text{ex}} = 360$  nm) spectra and plot of optical transmittance (C) of vesicular dispersion of N<sub>3</sub>-(OEG-IBCAPE)<sub>4</sub> in ultrapure water (0.25 mg mL<sup>-1</sup> × 1.5 mL) upon CO<sub>2</sub> bubbling.

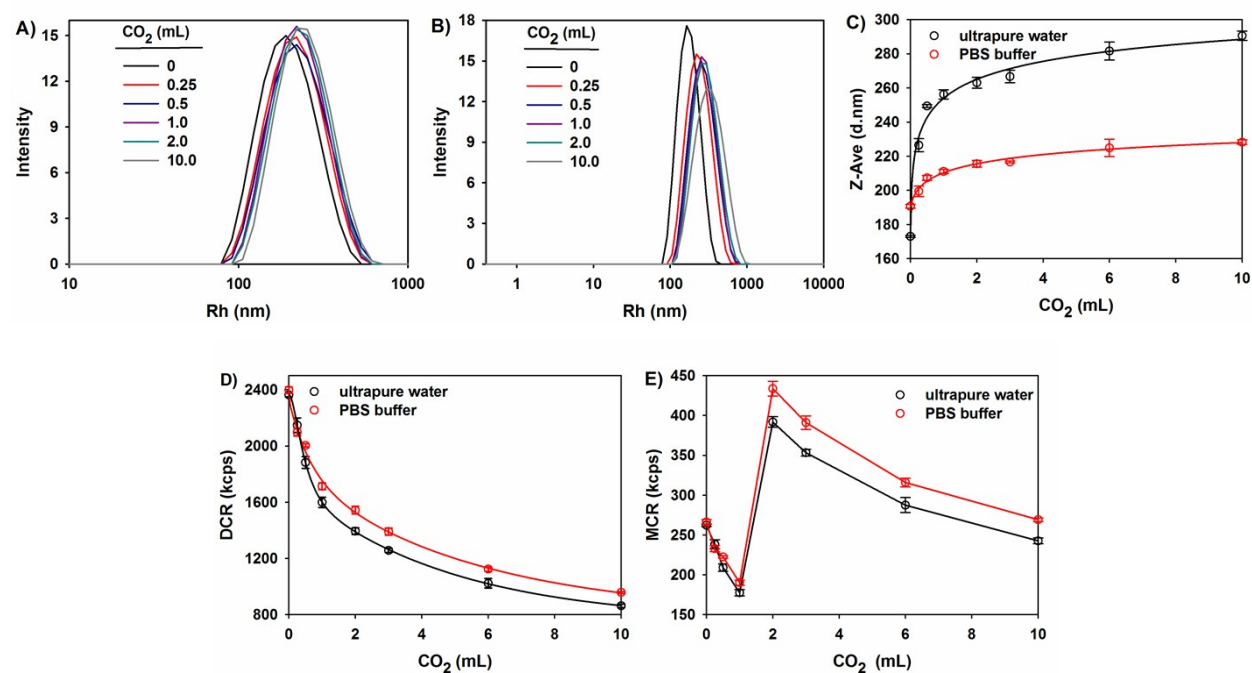

**Figure S12.** The size distribution of N<sub>3</sub>-(OEG-IBCAPE)<sub>4</sub> in ultrapure water (A), PBS buffer solutions (B) (0.25 mg mL<sup>-1</sup> × 1.5 mL) upon CO<sub>2</sub>, respectively. C) Plots of diameter of N<sub>3</sub>-(OEG-IBCAPE)<sub>4</sub> (0.25 mg mL<sup>-1</sup> × 1.5 mL) vs injected amount of CO<sub>2</sub> in ultrapure water and PBS buffer solutions, respectively. D), E) DLS analysis of N<sub>3</sub>-(OEG-IBCAPE)<sub>4</sub> in ultrapure water and PBS buffer solutions (0.25 mg mL<sup>-1</sup> × 1.5 mL) upon CO<sub>2</sub>.

## 8. Absorption and Emission Spectra Analysis of mPEG-IBARS Aqueous Solutions

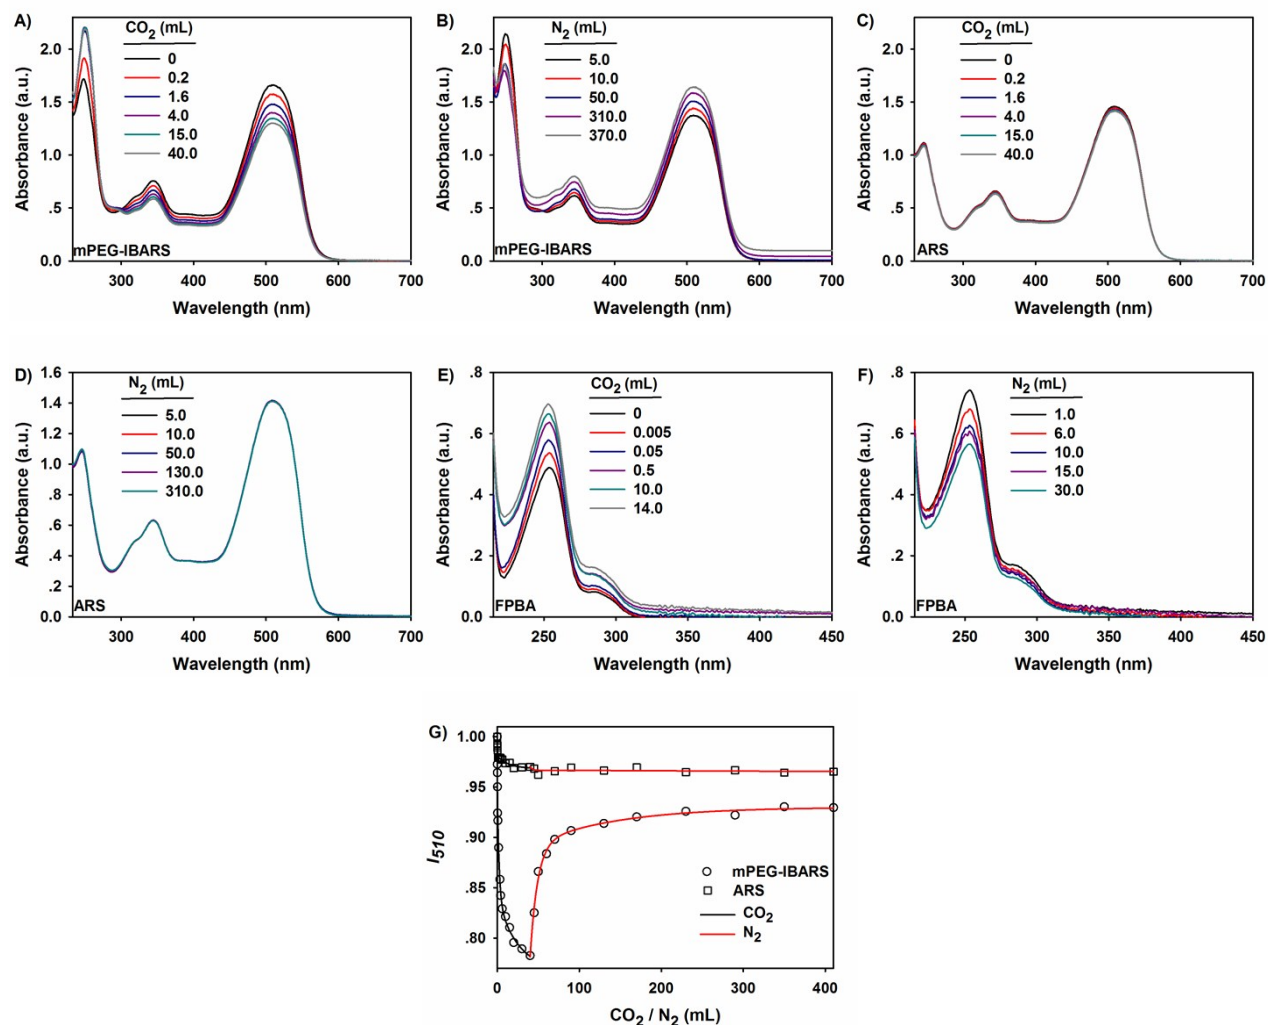

**Figure S13.** The absorption spectra change upon the addition and removal of  $\text{CO}_2$ . A, B) mPEG-IBARS. C, D) ARS. E, F) FPBA. G) The reversible change of the normalized intensity at 510 nm ( $I_{510}$ ) of mPEG-IBARS and ARS aqueous solution upon addition and removal of  $\text{CO}_2$ .

The primary  $\text{CO}_2$ -induced hydrolysis process of mPEG-IBARS aqueous solution ( $0.25 \text{ mg mL}^{-1} \times 1.5 \text{ mL}$ , pH 7.4) was also verified using absorption spectroscopy. As shown in Figure S13A, mPEG-IBARS aqueous solution before  $\text{CO}_2$  bubbling showed a characteristic absorption band of IBARS moieties at 250 nm, 342 nm and 510 nm. In the presence of  $\text{CO}_2$ , the absorption band at 250 nm increased with a gradually decreased at 342 and 510 nm, respectively, ascribing to the cleavage of iminoboronic acid ester of dynamic B–O and C=N bonds and the generation of FPBA and ARS as byproduct. As shown in Figure S13B, these absorption band can be mostly regained to their initial intensity after removing  $\text{CO}_2$  with  $\text{N}_2$ , intensely indicating the reversible hydrolysis of iminoboronate binding upon alternative  $\text{CO}_2$  and  $\text{N}_2$ . Figure S13C and S13D showed a very weak change of characteristic absorption bands at at 245 nm, 345 nm and 510 nm of ARS upon the

bubbling of CO<sub>2</sub> and N<sub>2</sub>. While Figure S13E and S13F showed that the characteristic absorption band of FPBA at 205-350 nm intervals changed much and reversibly upon the bubbling of CO<sub>2</sub> and N<sub>2</sub>. Figure S13G gave the reversible changes of the normalized intensity at 510 nm ( $I_{510}$ ) of mPEG-IBARS and ARS aqueous solution. These results confirmed the iminoboronate ester can be reversibly hydrolyzed in aqueous solution through the alternative bubbling of CO<sub>2</sub> and N<sub>2</sub>.

## 9. The Cellular Uptake of Polymersomes Observed with Confocal Laser Scanning Microscopy

N<sub>3</sub>-(OEG-IBCAPE)<sub>4</sub> or free CAPE was dispersed in the medium by slightly ultrasonication right before their introduction to the cells. For confocal microscopy study, cells were seeded at initial densities of  $5 \times 10^4$  cells/mL in dishes (35 mm confocal imaging dish, ibidi, Cat. No. 81156) and incubated for 24 hours before introducing N<sub>3</sub>-(OEG-IBCAPE)<sub>4</sub> or free CAPE. Live cell confocal microscopy was used to assess the cellular uptake of the N<sub>3</sub>-(OEG-IBCAPE)<sub>4</sub> or free CAPE. HL-60 cells were incubated with N<sub>3</sub>-(OEG-IBCAPE)<sub>4</sub> and free CAPE at the same drug concentration (50 µg/mL). After incubation for 24 hours, cells were carefully washed with PBS, and stained by Hoechst-33342 ThermoFisher Scientific H1399, with excitation/emission ~350/461 nm) for 5 min. After that, the stain solution was removed and the cells were washed 2-3 times in PBS. Images were taken using a Leica TCS SP5 Confocal Microscope.

## 10. In Vitro Cytotoxicity Assay

MTT assay was conducted to evaluate the cell viability. Briefly, after incubation with a drug free medium for 24 hours, cells were transferred to a series concentration of N<sub>3</sub>-(OEG-NH<sub>2</sub>)<sub>4</sub>, N<sub>3</sub>-(OEG-IBCAPE)<sub>4</sub> or CAPE. Then all the cell samples were further incubated for 24 hours. After that, cell culture medium was replaced with MTT assay solution (0.5 mg/mL) and the cells were further incubated for 4 hours at 37 °C. Then MTT solution was removed and DMSO was added. The absorbance was measured at 570 nm with a reference of 690 nm using a microplate reader (#680, Bio-Rad). The relative cell viability was calculated as a percentage compared to the control samples (treated with fresh medium).
